# Supplementary material
Source: PubMed Central journal article supplement (PMC1838466)

2 bp Indel Frequency For Each Dinucleotide

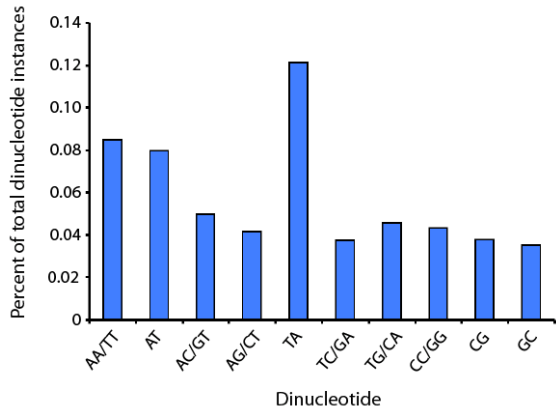

Enrichment of Tandem Repeats in Dinucleotide Indels

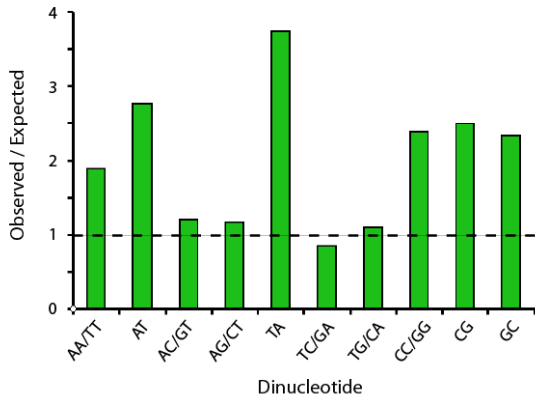

Supplement: pnas_0700890104_3.pdf [file pnas_0700890104_3.pdf]
