# Supplementary material
Source: PubMed Central journal article supplement (PMC1838466)
Supplement: pnas_0700890104_6.pdf [file pnas_0700890104_6.pdf]

**Table 4.** Coding polymorphism

| Amino acid    | Total counts<br>(both haplomes) | Synonymous<br>instances as %<br>of total counts | Synonymous<br>instances as %<br>of identical<br>amino acids | Nonsynonymous<br>instances as % of<br>total counts |
|---------------|---------------------------------|-------------------------------------------------|-------------------------------------------------------------|----------------------------------------------------|
| Alanine       | 350,264                         | 7.83                                            | 7.95                                                        | 1.47                                               |
| Arginine      | 305,585                         | 7.77                                            | 7.85                                                        | 1.10                                               |
| Asparagine    | 279,226                         | 3.63                                            | 3.70                                                        | 1.67                                               |
| Aspartic acid | 311,705                         | 4.06                                            | 4.11                                                        | 1.28                                               |
| Cysteine      | 137,683                         | 4.75                                            | 4.78                                                        | 0.62                                               |
| Glutamic acid | 343,691                         | 3.39                                            | 3.43                                                        | 1.27                                               |
| Glutamine     | 240,466                         | 3.23                                            | 3.27                                                        | 1.15                                               |
| Glycine       | 336,165                         | 7.84                                            | 7.91                                                        | 0.79                                               |
| Histidine     | 147,425                         | 4.83                                            | 4.91                                                        | 1.57                                               |
| Isoleucine    | 327,928                         | 5.37                                            | 5.46                                                        | 1.62                                               |
| Leucine       | 531,281                         | 9.20                                            | 9.28                                                        | 0.88                                               |
| Lysine        | 349,970                         | 2.94                                            | 2.98                                                        | 1.19                                               |
| Methionine    | 141,415                         |                                                 |                                                             | 1.70                                               |
| Phenylalanine | 247,127                         | 6.40                                            | 6.46                                                        | 0.86                                               |
| Proline       | 257,325                         | 8.75                                            | 8.83                                                        | 0.97                                               |
| Serine        | 456,607                         | 7.06                                            | 7.18                                                        | 1.58                                               |
| Threonine     | 333,203                         | 7.77                                            | 7.90                                                        | 1.69                                               |
| Tryptophan    | 75,136                          |                                                 |                                                             | 0.31                                               |
| Tyrosine      | 190,402                         | 4.08                                            | 4.12                                                        | 0.86                                               |
| Valine        | 401,625                         | 7.07                                            | 7.17                                                        | 1.35                                               |
| Total         | 5,764,229                       | 5.94                                            | 6.01                                                        | 1.15                                               |
